# Supplementary material for: An electrochemical paper-based analytical sensor for one-step latex protein detection
Source: Royal Society of Chemistry journal article supplement (doi:10.1039/d1an02067f), 2022-01-01

Supporting information

An electrochemical paper-based analytical sensor for one-step latex  
protein detection

Figure

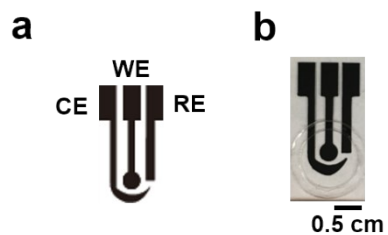

Figure S1. (a) Design drawing of a CSPE consisting of a reference electrode (RE), a working electrode (WE), and a counter electrode (CE). (b) Photograph of a completed CSPE with a ring-shape packing tape to confine the solution.

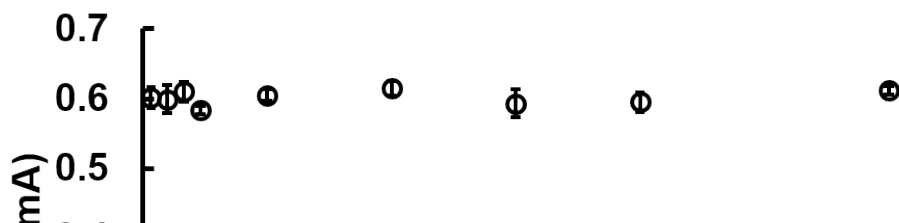

Supplement: d1an02067f1.pdf [file d1an02067f1.pdf]
